# Supplementary material
Source: publisher figshare collection journal article supplement (https://tandf.figshare.com/articles/dataset/_/14061201)
Supplement: Supplementary file 1 [file 1]

### Supplemental Online Material S2. The 39-item survey based on the Theoretical Domains Framework

| Theoretical Domains<br>Framework domains | No. | Origin of the<br>question | Question                                                                                                                                                                                                                |
|------------------------------------------|-----|---------------------------|-------------------------------------------------------------------------------------------------------------------------------------------------------------------------------------------------------------------------|
| Knowledge                                | 1   | J.M. Huijg Checklist      | I have sufficient theoretical knowledge on the effect of physical activity on hospitalized patients.                                                                                                                    |
|                                          | 2   | Multidisciplinary team    | I know when it is safe to improve physical activity levels in hospitalized patients.                                                                                                                                    |
| Skills                                   | 3   | J.M. Huijg Checklist      | I have sufficient skills to improve physical activity levels in hospitalized patients                                                                                                                                   |
| Social/professional<br>role and identity | 4   | J.M. Huijg Checklist      | I think that as a physician / nurse / physical therapist (your profession) it is my job to improve physical activity levels in hospitalized patients.                                                                   |
| Beliefs about<br>capabilities            | 5   | J.M. Huijg Checklist      | I am confident that I will succeed in improving the physical activity levels of hospitalized patients.                                                                                                                  |
|                                          | 6   | J.M. Huijg Checklist      | I am confident that I will succeed in improving the physical activity levels of hospitalized patients even when I encounter barriers (e.g. lack of time, participants are not motivated, increased medical complexity). |
| Beliefs about<br>consequences            | 7   | J.M. Huijg Checklist      | If I improve the physical activity levels of hospitalized patients, this will lead to improved physical performance in these hospitalized patients.                                                                     |
|                                          | 8   | J.M. Huijg Checklist      | If I improve the physical activity levels of hospitalized patients, I will risk physical injury.                                                                                                                        |
|                                          | 9   | J.M. Huijg Checklist      | If I improve the physical activity levels of hospitalized patients, this will negatively influence the patient-healthcare professional relationship.                                                                    |
|                                          | 10  | Multidisciplinary team    | If I improve the physical activity levels of hospitalized patients, it will positively influence the patient-healthcare professional relationship.                                                                      |

|                                          |    |                        |                                                                                                                                                             |
|------------------------------------------|----|------------------------|-------------------------------------------------------------------------------------------------------------------------------------------------------------|
|                                          | 11 | Multidisciplinary team | If I improve the physical activity levels of hospitalized patients, this will lead to a lack of time for other tasks/things I have to do.                   |
| Motivation & goals                       | 12 | J.M. Huijg Checklist   | I am motivated to improve the physical activity level of hospitalized patients.                                                                             |
|                                          | 13 | J.M. Huijg Checklist   | Other work tasks/things I need to do interfere with improving the physical activity levels in hospitalized patients.                                        |
| Memory, attention and decision processes | 14 | J.M. Huijg Checklist   | I can easily remember what I need to do to improve physical activity levels in hospitalized patients.                                                       |
| Environmental context and resources      | 15 | J.M. Huijg Checklist   | All information and materials that are necessary to improve the physical activity levels in hospitalized patients are available.                            |
|                                          | 16 | J.M. Huijg Checklist   | Improving the physical activity levels in hospitalized patients gives me a lot of benefits.                                                                 |
|                                          | 17 | J.M. Huijg Checklist   | It is clear to me which activities I need to do and when/in which order I need to do them to improve the physical activity levels in hospitalized patients. |
|                                          | 18 | J.M. Huijg Checklist   | Improving the physical activity levels in hospitalized patients is compatible with how I am accustomed to working.                                          |
|                                          | 19 | J.M. Huijg Checklist   | The effects of improving the physical activity levels in hospitalized patients are clearly visible to me (e.g. participants' motivation, behavior, health). |
|                                          | 20 | J.M. Huijg Checklist   | I have sufficient time to improve the physical activity levels in hospitalized patients.                                                                    |
|                                          | 21 | J.M. Huijg Checklist   | I can choose how I want to improve the physical activity levels in hospitalized patients (i.e., it is not imposed by others).                               |

|  |    |                        |                                                                                                                                                                                                           |
|--|----|------------------------|-----------------------------------------------------------------------------------------------------------------------------------------------------------------------------------------------------------|
|  | 22 | J.M. Huijg Checklist   | I experience the collaboration with regard to improving the physical activity levels in hospitalized patients as positive (e.g. nurses, physicians, physical therapists, other healthcare professionals). |
|  | 23 | J.M. Huijg Checklist   | On my hospital ward, formal arrangements are made with regard to improving the physical activity levels in hospitalized patients (i.e., policy, work plans).                                              |
|  | 24 | J.M. Huijg Checklist   | On my hospital ward, there are sufficient facilities to improve the physical activity levels in hospitalized patients (e.g. equipment, material, space).                                                  |
|  | 25 | J.M. Huijg Checklist   | On my hospital ward, other changes interfere with improving the physical activity levels in hospitalized patients (e.g., reorganizations, cutbacks, the introduction of other innovations).               |
|  | 26 | J.M. Huijg Checklist   | In general, hospitalized patients are positive about improving their physical activity levels during hospital admission.                                                                                  |
|  | 27 | J.M. Huijg Checklist   | In general, hospitalized patients are motivated to improve their physical activity levels during hospital admission.                                                                                      |
|  | 28 | Multidisciplinary team | In general, increased medical complexity of my patient influences my motivation to improve the physical activity level during hospital admission.                                                         |
|  | 29 | J.M. Huijg Checklist   | I would like to have information/knowledge to improve physical activity levels in hospitalized patients.                                                                                                  |
|  | 30 | J.M. Huijg Checklist   | I would like to have training to improve physical activity levels in hospitalized patients.                                                                                                               |
|  | 31 | J.M. Huijg Checklist   | I would like to have more assistance to improve physical activity level in hospitalized patients.                                                                                                         |

|                         |    |                        |                                                                                                                                                                                                |
|-------------------------|----|------------------------|------------------------------------------------------------------------------------------------------------------------------------------------------------------------------------------------|
| Social influences       | 32 | J.M. Huijg Checklist   | It is expected from me that I improve the physical activity levels in hospitalized patients (e.g., by colleagues, management, others involved).                                                |
|                         | 33 | J.M. Huijg Checklist   | I can count on sufficient support from people involved in improving the physical activity levels in hospitalized patients when I need it (e.g., from colleagues, management, others involved). |
| Emotion                 | 34 | J.M. Huijg Checklist   | I feel good when I improve the physical activity levels in hospitalized patients (e.g., optimistic, comfortable, calm, relaxed, cheerful, elated).                                             |
|                         | 35 | J.M. Huijg Checklist   | I feel bad when I improve the physical activity levels in hospitalized patients (e.g., nervous, pessimistic, depressed, sad, agitated, uncomfortable).                                         |
| Behavioral regulation   | 36 | J.M. Huijg Checklist   | I have clear plans of how I will improve the physical activity levels in hospitalized patients.                                                                                                |
|                         | 37 | J.M. Huijg Checklist   | I check regularly whether I am doing everything necessary to improve the physical activity levels in hospitalized patients.                                                                    |
|                         | 38 | Multidisciplinary team | I have clear plans of how I will improve the physical activity levels in hospitalized patients when I encounter barriers (e.g., lack of time, participants are not motivated).                 |
| Nature of the behaviors | 39 | J.M. Huijg Checklist   | Improving the physical activity levels in hospitalized patients is something I have made my own.                                                                                               |

J.M. Huijg Checklist reference:

Huijg JM. Towards the effective introduction of physical activity interventions in primary health care. Enschede, The Netherlands: University of Leiden; 2014.
