# Supplementary material
Source: publisher figshare collection journal article supplement (https://tandf.figshare.com/articles/dataset/_/14061201)
Supplement: Supplementary file 2 [file 1]

### **Supplemental Online Material S3. Detailed description of phase 1 survey development.**

No surveys were available in the literature to assess all of the factors that might be perceived by healthcare professionals as a barrier to improving physical activity in hospitalized patients. Therefore, a survey was developed using the 38-item pilot checklist described by Huijg et al[1], which is based on the Theoretical Domains Framework and aims to identify the most important barriers and enablers to the implementation of physical activity interventions[1-3]. Using the Theoretical Domains Framework as a basis ensured that all cognitive, affective, social, and environmental influences on behavior were considered[2]. A multidisciplinary team of a physical therapist (SJGG), a quality advisor (BMG), a senior researcher (MvdS), a nurse, and a medical psychologist (SdM) altered the 38-item pilot checklist such that it could be used for the particular research question under study. Irrelevant items in the 38-item pilot checklist were omitted, and additional items were identified by comparing the pilot checklist with the Determinants of Behavior Questionnaire[3,4] and with previous research on barriers to and enablers of physical activity in hospitalized patients[5-10]. As a pilot, three physicians/physician assistants, five nurses, four physical therapists, and a senior researcher tested the survey and provided feedback on item wording to ensure ease of use and to assess face validity. The final version of the survey consisted of 39 items (Supplemental Online Material S2).

#### **References:**

1. Huijg JM. Towards the effective introduction of physical activity interventions in primary health care. Enschede, The Netherlands: University of Leiden; 2014.
2. Atkins L, Francis J, Islam R, et al. A guide to using the Theoretical Domains Framework of behaviour change to investigate implementation problems. *Implement Sci.* 2017 Jun 21;12(1):77.

3. Huijg JM, Gebhardt WA, Dusseldorp E, et al. Measuring determinants of implementation behavior: psychometric properties of a questionnaire based on the theoretical domains framework. *Implement Sci.* 2014 Mar 19;9:33.
4. Huijg JM, Gebhardt WA, Crone MR, et al. Discriminant content validity of a theoretical domains framework questionnaire for use in implementation research. *Implement Sci.* 2014 Jan 15;9:11.
5. Brown CJ, Williams BR, Woodby LL, et al. Barriers to mobility during hospitalization from the perspectives of older patients and their nurses and physicians. *Journal of Hospital Medicine.* 2007;2:305-313.
6. Dermody G. Barriers to Nurses' Promoting Mobility in Hospitalized Older Adults. University of Wisconsin Milwaukee: UWM Digital Commons Theses and Dissertations; 2016.
7. Kneafsey R, Clifford C, Greenfield S. What is the nursing team involvement in maintaining and promoting the mobility of older adults in hospital? A grounded theory study. *Int J Nurs Stud.* 2013 Dec;50(12):1617-29.
8. Leditschke IA, Green M, Irvine J, et al. What are the barriers to mobilizing intensive care patients? *Cardiopulmonary physical therapy journal.* 2012;23:26-9.
9. De Klein K, Valkenet K, Veenhof C. Perspectives of patients and health-care professionals on physical activity of hospitalized patients. *Physiother Theory Pract.* 2019 Jun 17:1-8.
10. Hoyer EH, Brotman DJ, Chan KS, et al. Barriers to early mobility of hospitalized general medicine patients: survey development and results. *Am J Phys Med Rehabil.* 2015 Apr;94(4):304-12.
