# Supplementary material
Source: publisher figshare collection journal article supplement (https://tandf.figshare.com/articles/dataset/_/14061201)
Supplement: Supplementary file 3 [file 1]

**Supplemental Online Material S1. The Good Reporting on a Mixed Methods Study (GRAMMS) criteria**

| <b>Guideline</b>                                                                                   | <b>Section: page</b>                                                                                                                                                                                                                              |
|----------------------------------------------------------------------------------------------------|---------------------------------------------------------------------------------------------------------------------------------------------------------------------------------------------------------------------------------------------------|
| <b>Describe the justification for using a mixed methods approach to the research question</b>      | Introduction: page 4                                                                                                                                                                                                                              |
| <b>Describe the design in terms of the purpose, priority and sequence of methods</b>               | Methods- under study design: page 5                                                                                                                                                                                                               |
| <b>Describe each method in terms of sampling, data collection and analysis</b>                     | Methods- under “Context and study population”: page 5, 6<br>Methods- under “Phase 1 – Using surveys to identify important barriers”: page 6, 7<br>Methods- under “Phase 2 – Using focus groups to discuss these important barriers”: page 7, 8, 9 |
| <b>Describe where integration has occurred, how it has occurred and who has participated in it</b> | Methods- under “Integration – Using the survey findings to build focus group topic guides”: page 7<br>Results- under “Integration – Using the survey findings to develop focus group topic guides”: page 11                                       |

|                                                                                              |                                                                                                |
|----------------------------------------------------------------------------------------------|------------------------------------------------------------------------------------------------|
| <b>Describe any limitation of one method associated with the present of the other method</b> | Methods- under “Study design”: page 5                                                          |
| <b>Describe any insights gained from mixing or integrating methods</b>                       | Results- under “Phase 2 – Key barriers and solutions to overcome these barriers”: page 11 – 18 |

O'Cathain, Alicia & Murphy, Elizabeth & Nicholl, Jon. (2008). The Quality of Mixed Methods Studies in Health Services Research. Journal of health services research & policy. 13. 92-8. 10.1258/jhsrp.2007.007074.
